# Supplementary material for: α-Trifluoromethyl Chalcones as Potent Anticancer Agents for Androgen Receptor-Independent Prostate Cancer
Source: MDPI journal article supplement (doi:10.3390/molecules26092812), 2021-05-10
Supplement: s1 [file s1]

## Supporting Information

### **$\alpha$ -Trifluoromethyl Chalcones as Potent Anticancer Agents for Androgen Receptor-Independent Prostate Cancer**

*Yohei Saito,<sup>†</sup> Atsushi Mizokami,<sup>\*,‡</sup> Kouji Izumi,<sup>‡</sup> Renato Naito,<sup>‡</sup> Masuo Goto<sup>§</sup> and Kyoko Nakagawa-Goto<sup>\*,†,§</sup>*

<sup>†</sup>School of Pharmaceutical Sciences, College of Medical, Pharmaceutical and Health Science, Kanazawa University, Kanazawa, 920-1192, Japan

<sup>‡</sup>Department of Integrative Cancer Therapy and Urology, School of Medical Sciences, Kanazawa University, Kanazawa, 920-1192, Japan

<sup>§</sup>Chemical Biology and Medicinal Chemistry, Eshelman School of Pharmacy, University of North Carolina, Chapel Hill, North Carolina 27599, United States

#### **Table of Contents**

|                                                                                                             |       |
|-------------------------------------------------------------------------------------------------------------|-------|
| Figures S1–S40. <sup>1</sup> H NMR, <sup>13</sup> C NMR, FT-IR, and UV-VIS spectra of compounds <b>2–11</b> | S2–22 |
| Table S1. Detailed information of detected binding proteins.....                                            | S23   |

**Figure S1.**  $^1\text{H}$  NMR spectrum of compound **2** (600 MHz, in  $\text{CDCl}_3$ )

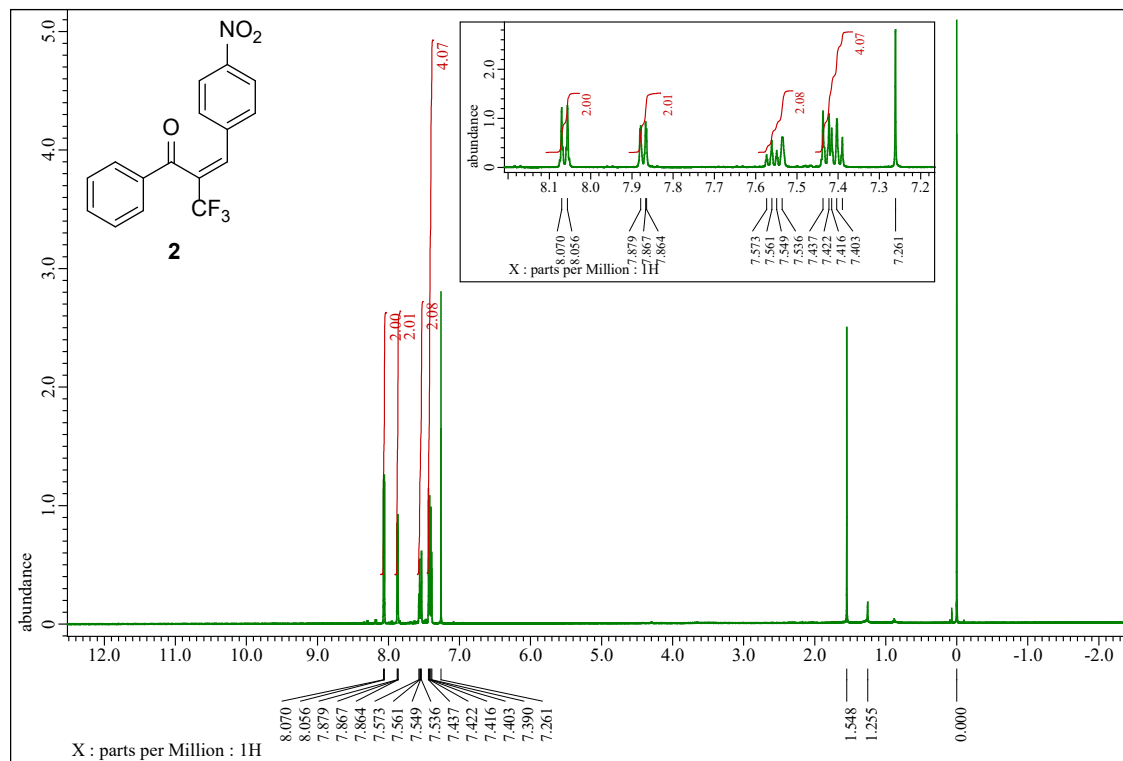

**Figure S2.**  $^{13}\text{C}$  NMR spectrum of compound **2** (150 MHz, in  $\text{CDCl}_3$ )

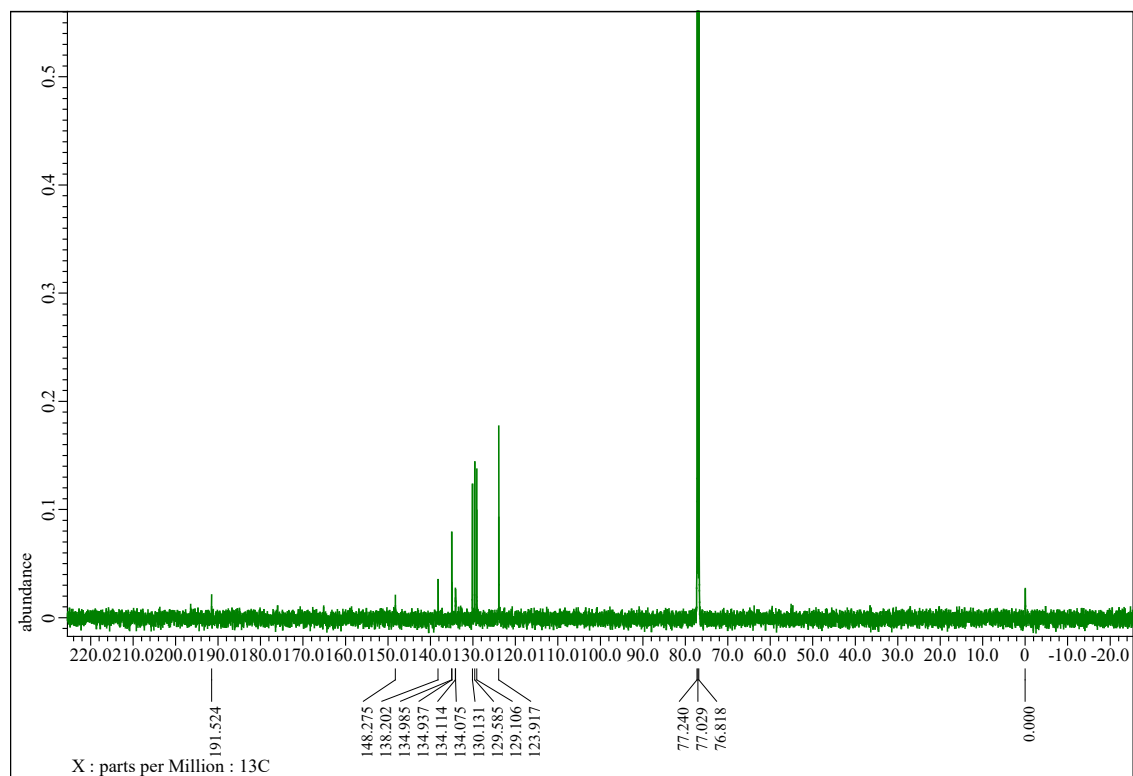

**Figure S3.** FT-IR spectrum of compound **2** (neat)

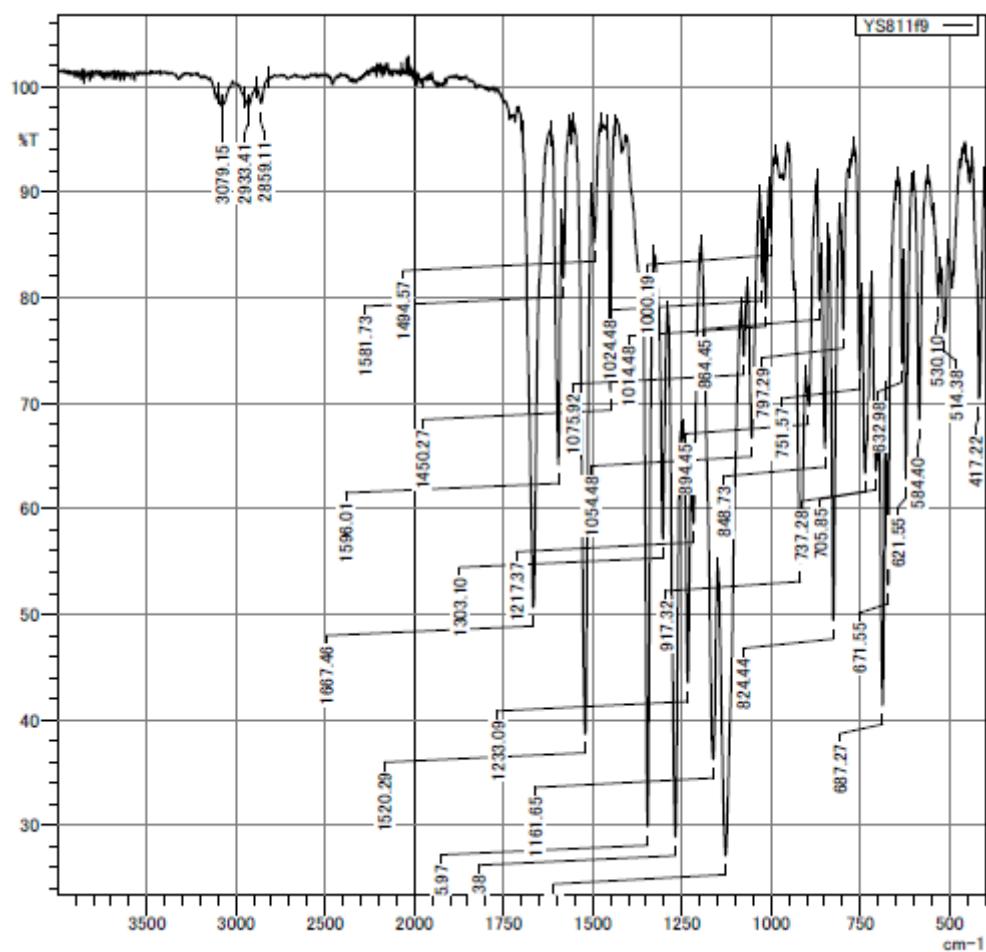

**Figure S4.** UV-VIS spectrum of compound **2** (MeCN/H<sub>2</sub>O, 1:1)

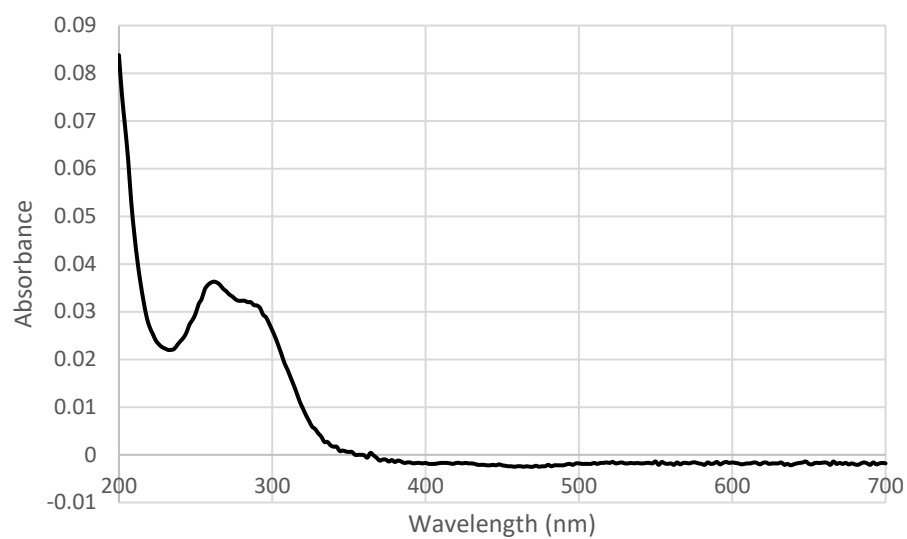

**Figure S5.**  $^1\text{H}$  NMR spectrum of compound **3** (400 MHz, in  $\text{CDCl}_3$ )

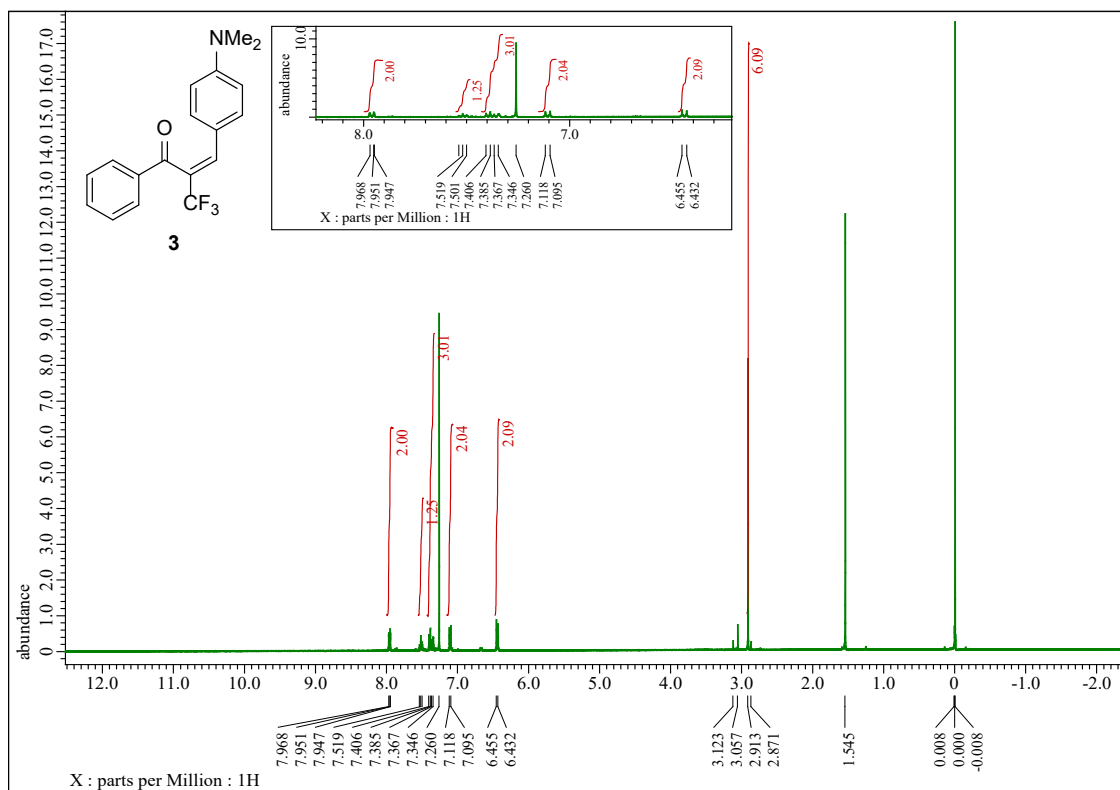

**Figure S6.**  $^{13}\text{C}$  NMR spectrum of compound **3** (100 MHz, in  $\text{CDCl}_3$ )

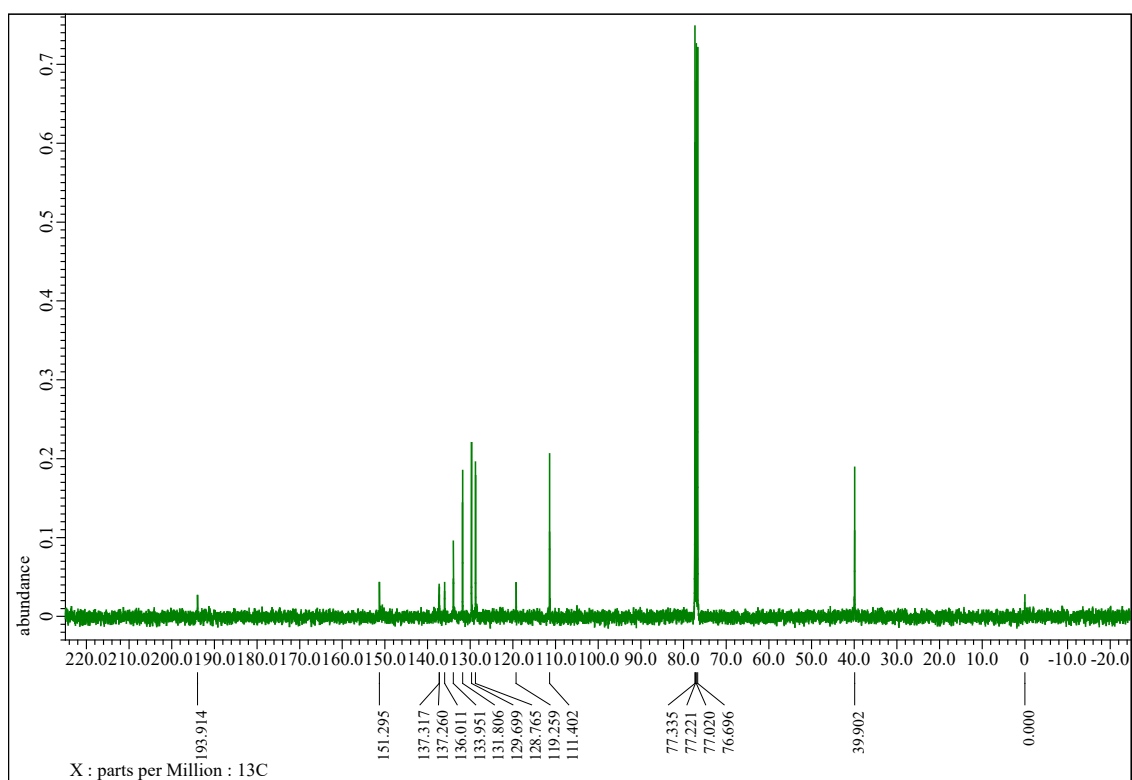

**Figure S7.** FT-IR spectrum of compound **3** (neat)

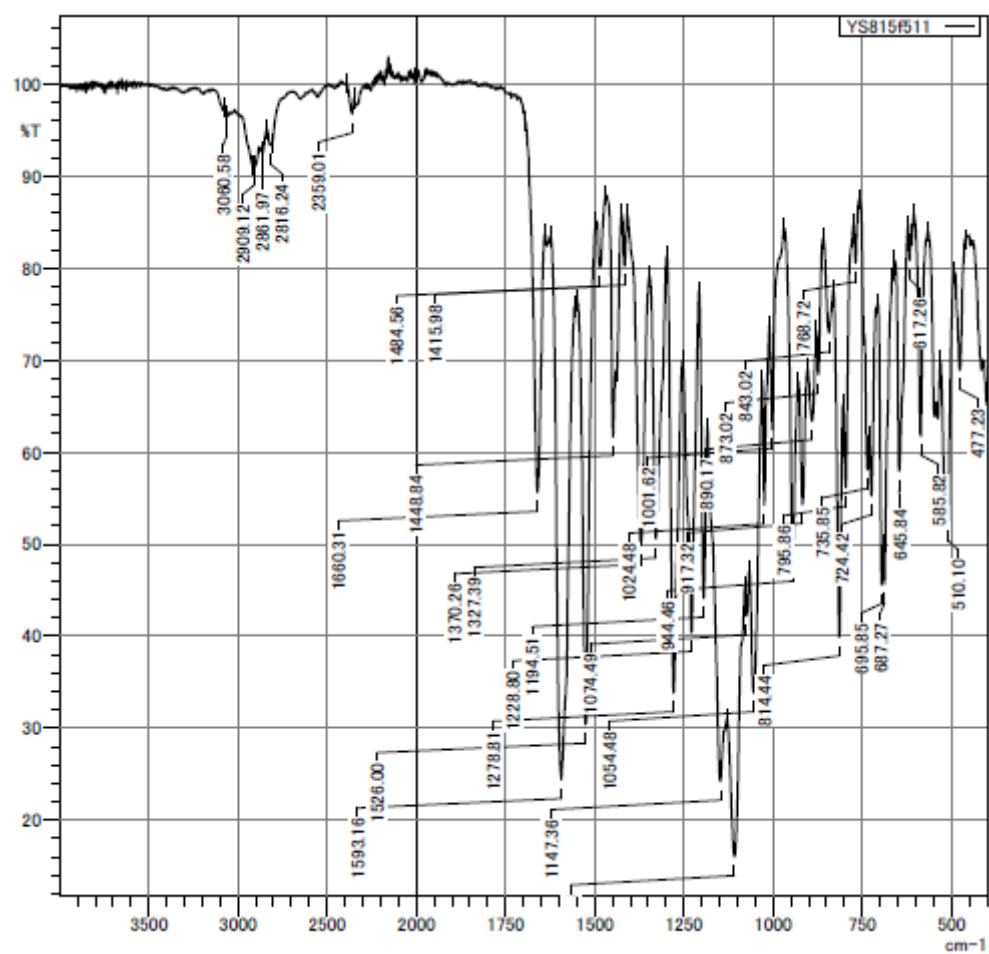

**Figure S8.** UV-VIS spectrum of compound **3** (MeCN/H<sub>2</sub>O, 1:1)

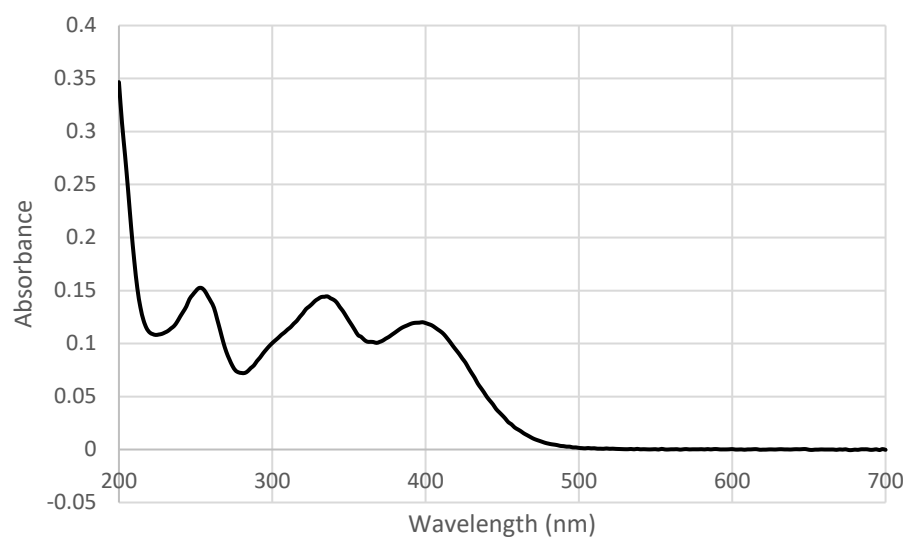

**Figure S9.**  $^1\text{H}$  NMR spectrum of compound **4** (400 MHz, in  $\text{CDCl}_3$ )

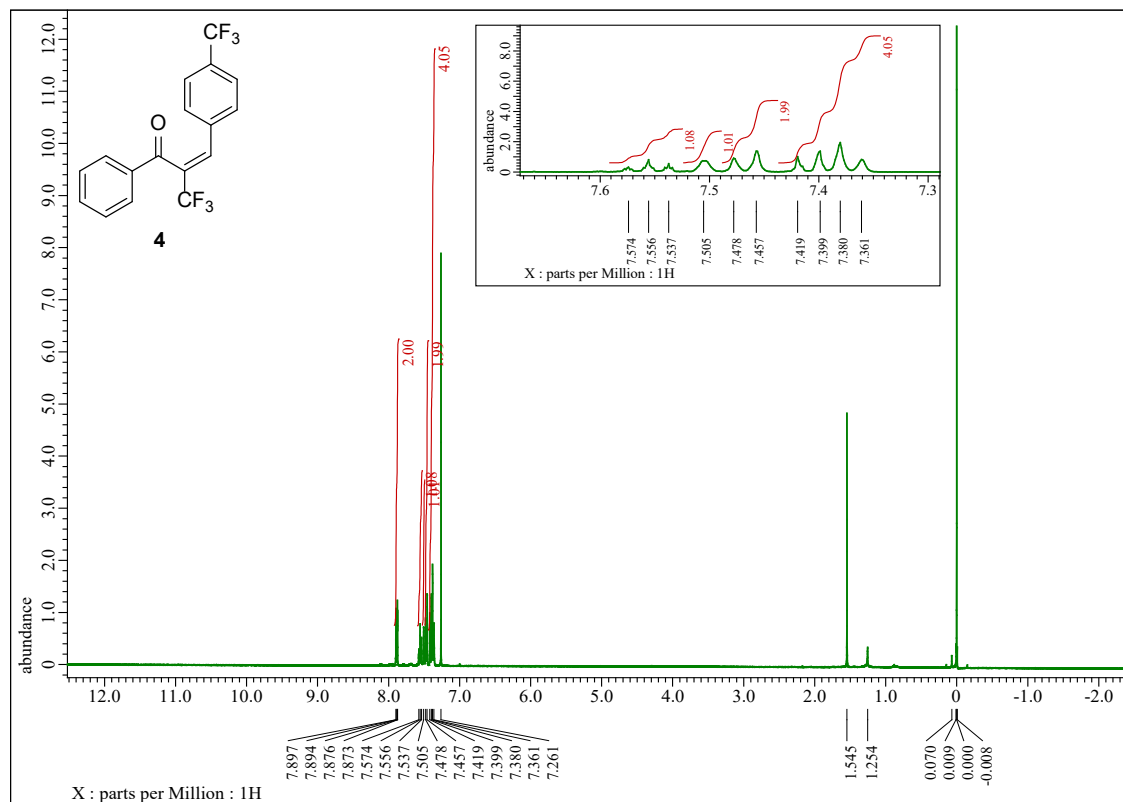

**Figure S10.**  $^{13}\text{C}$  NMR spectrum of compound **4** (150 MHz, in  $\text{CDCl}_3$ )

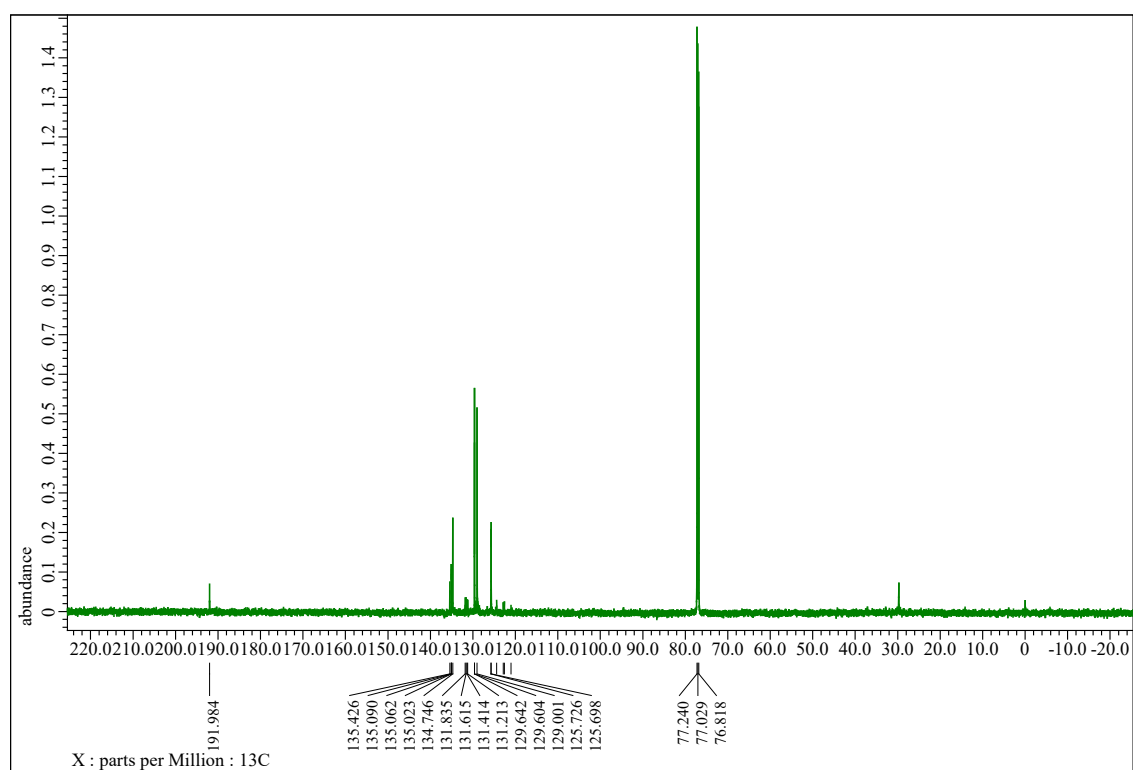

**Figure S11.** FT-IR spectrum of compound **4** (neat)

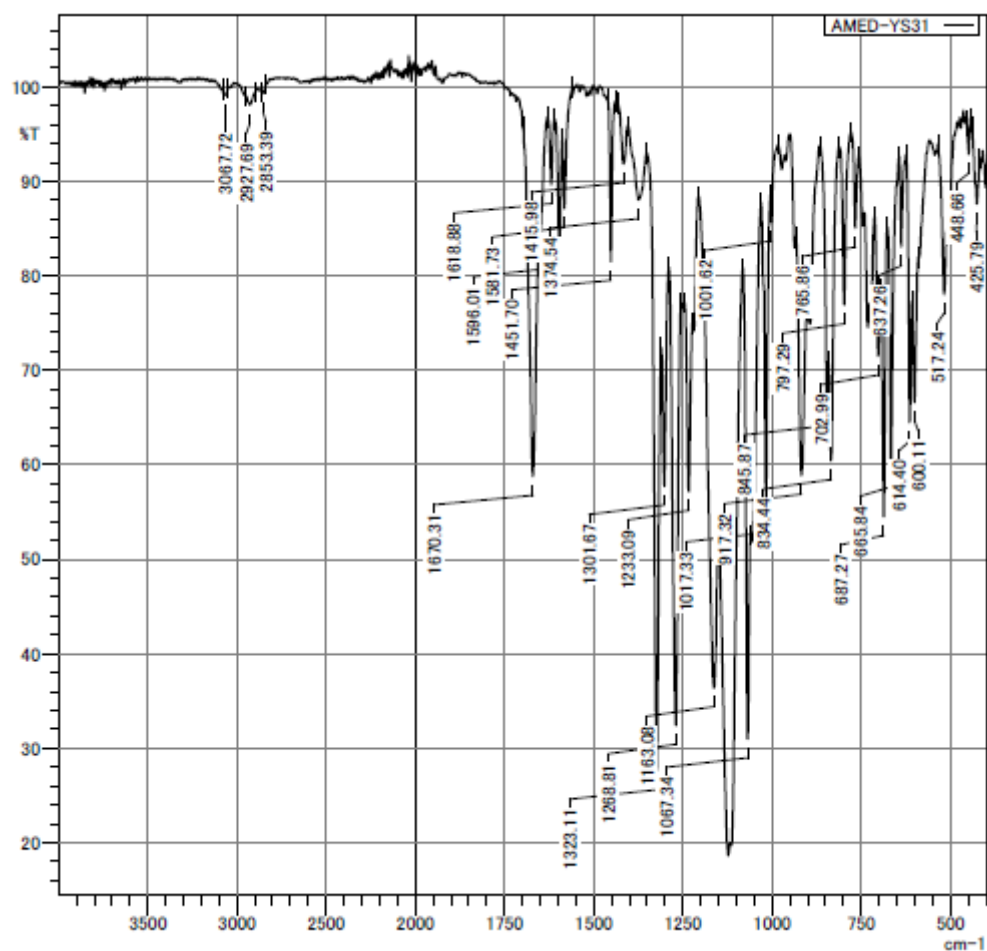

**Figure S12.** UV-VIS spectrum of compound **4** (MeCN/H<sub>2</sub>O, 1:1)

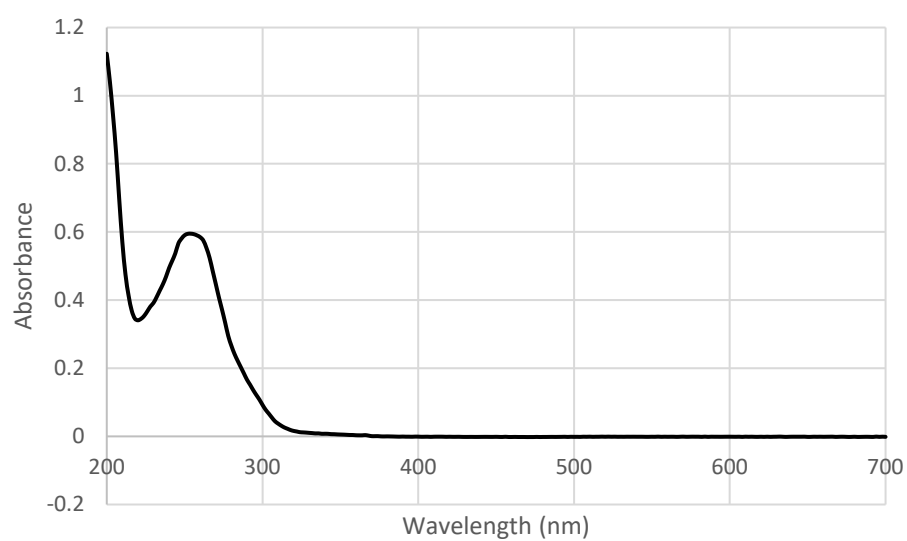

**Figure S13.**  $^1\text{H}$  NMR spectrum of compound **5** (600 MHz, in  $\text{CDCl}_3$ )

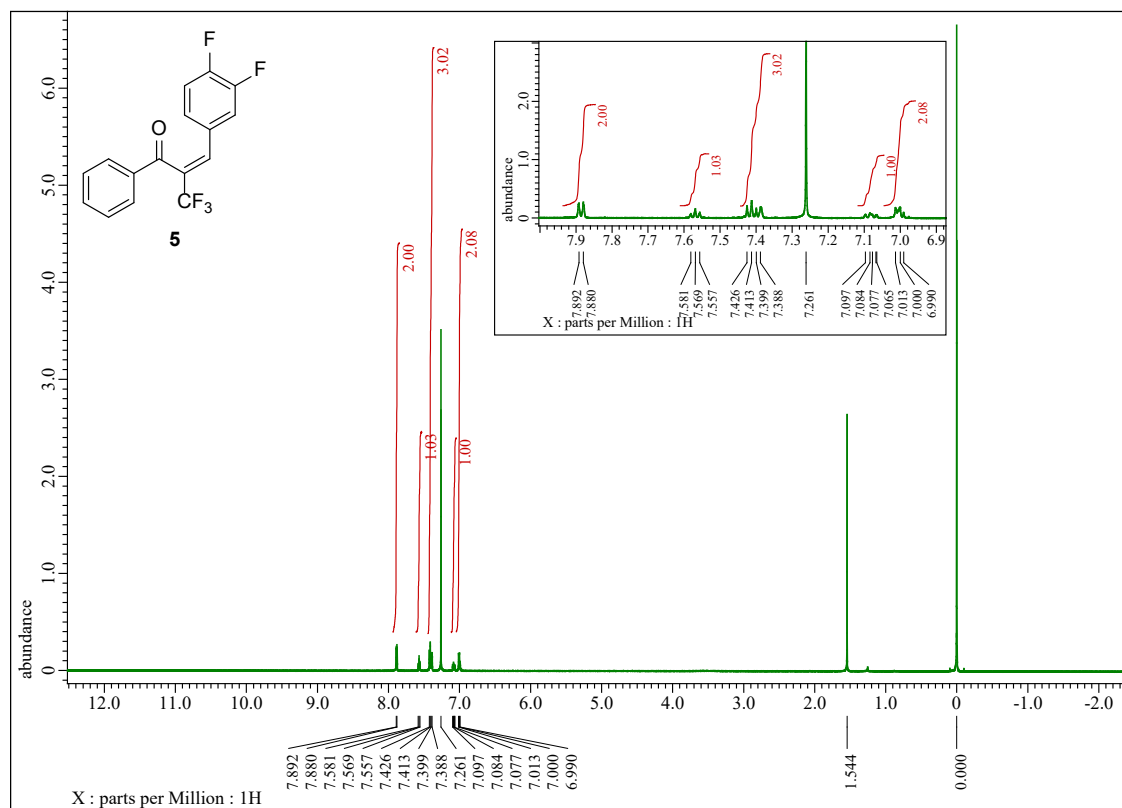

**Figure S14.**  $^{13}\text{C}$  NMR spectrum of compound **5** (150 MHz, in  $\text{CDCl}_3$ )

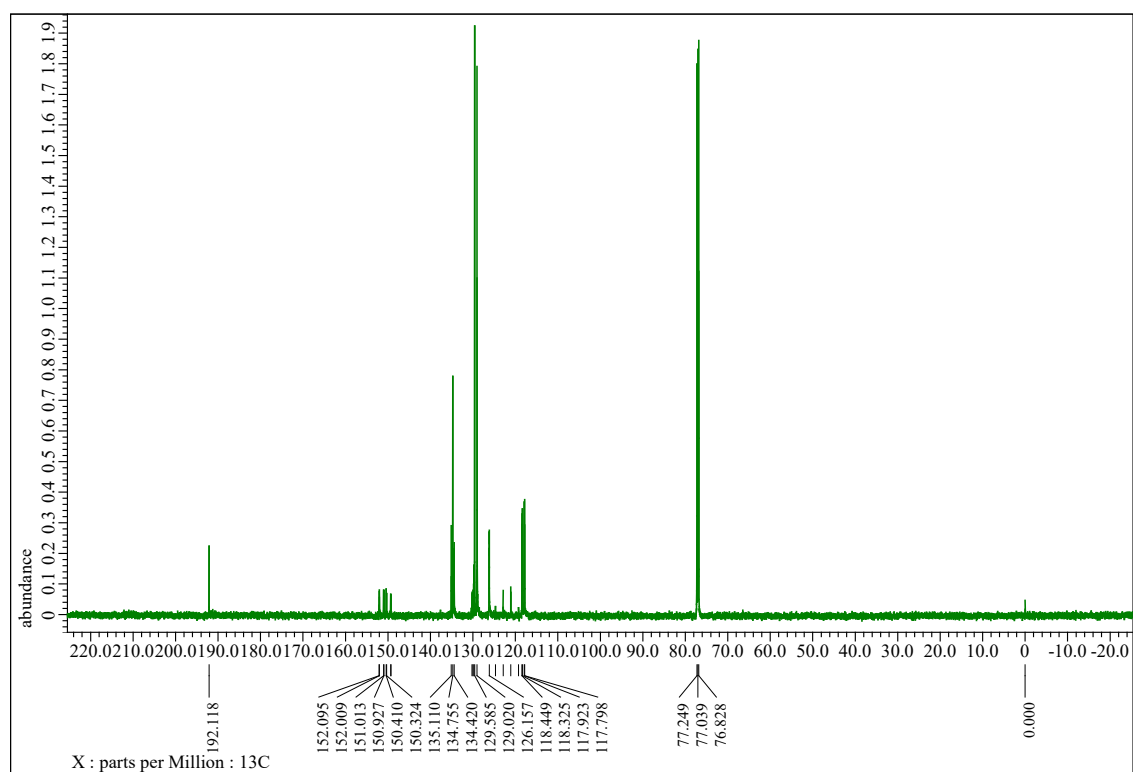

**Figure S15.** FT-IR spectrum of compound **5** (neat)

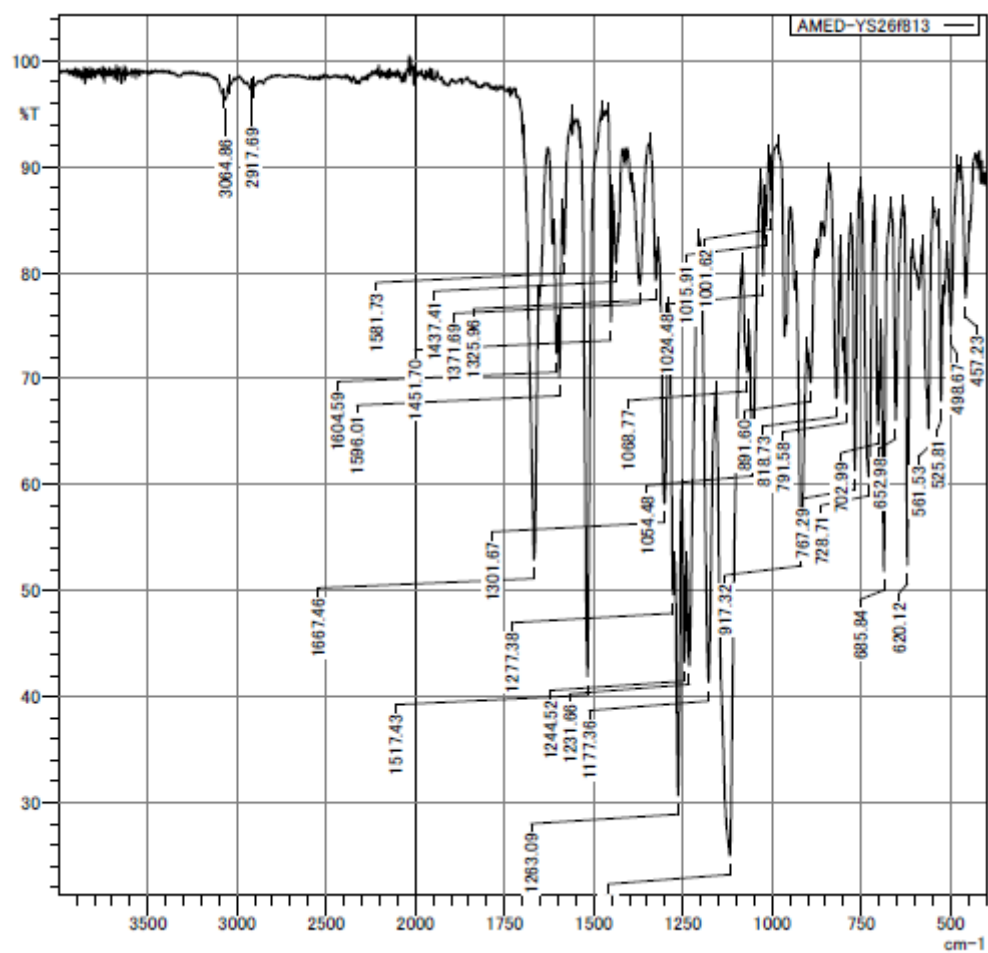

**Figure S16.** UV-VIS spectrum of compound **5** (MeCN/H<sub>2</sub>O, 1:1)

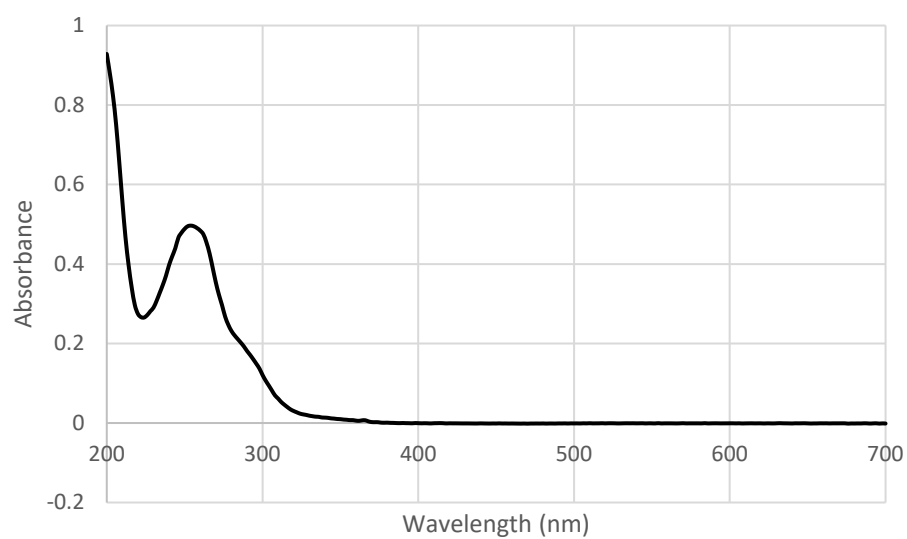

**Figure S17.**  $^1\text{H}$  NMR spectrum of compound **6** (600 MHz, in  $\text{CDCl}_3$ )

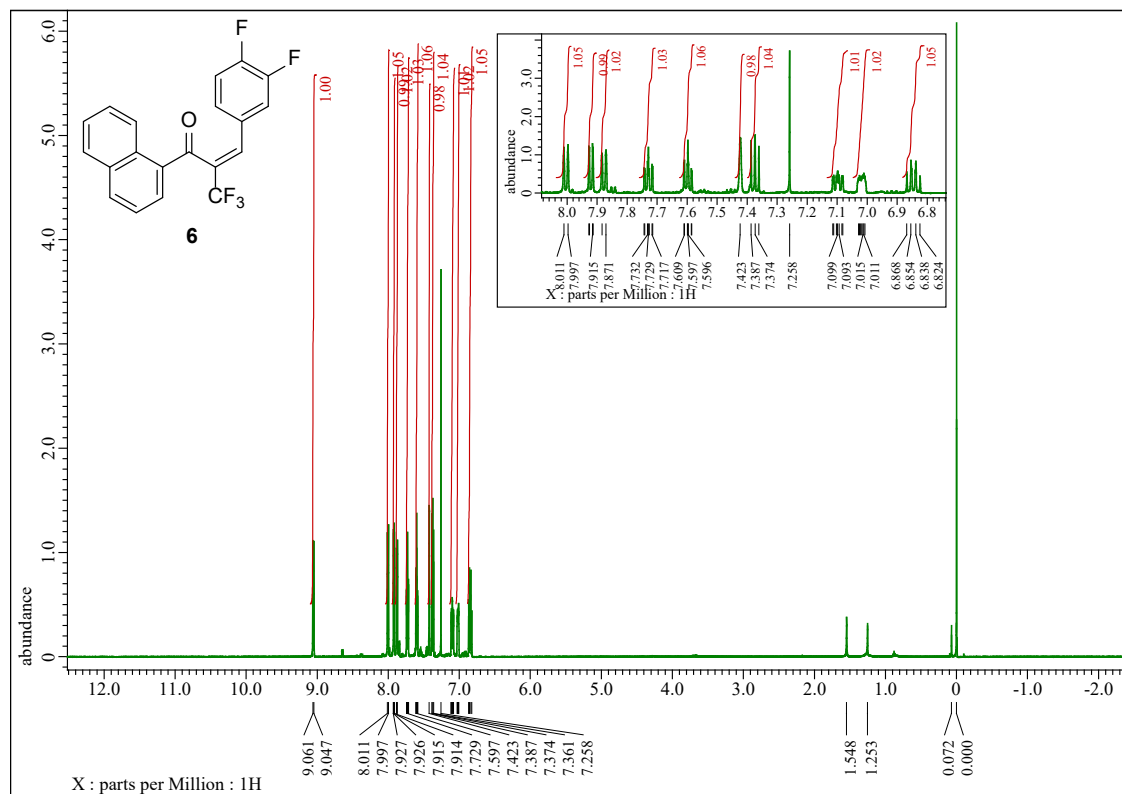

**Figure S18.**  $^{13}\text{C}$  NMR spectrum of compound **6** (150 MHz, in  $\text{CDCl}_3$ )

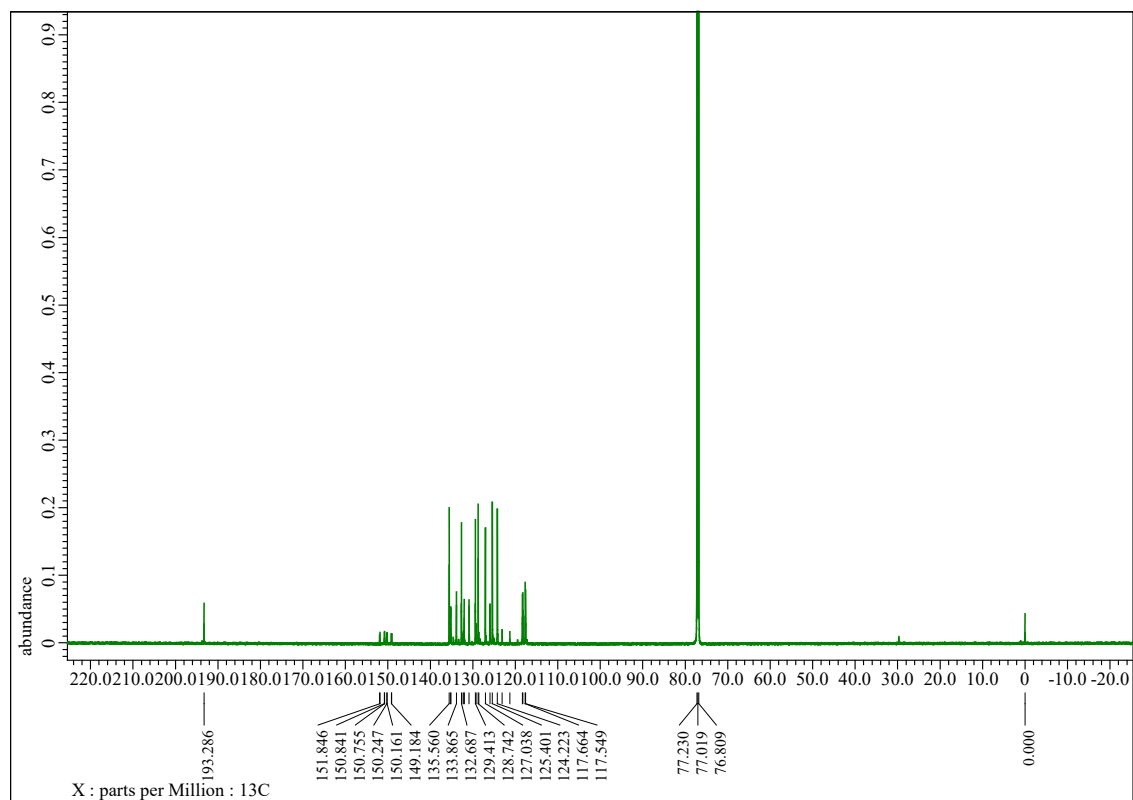

**Figure S19.** FT-IR spectrum of compound **6** (neat)

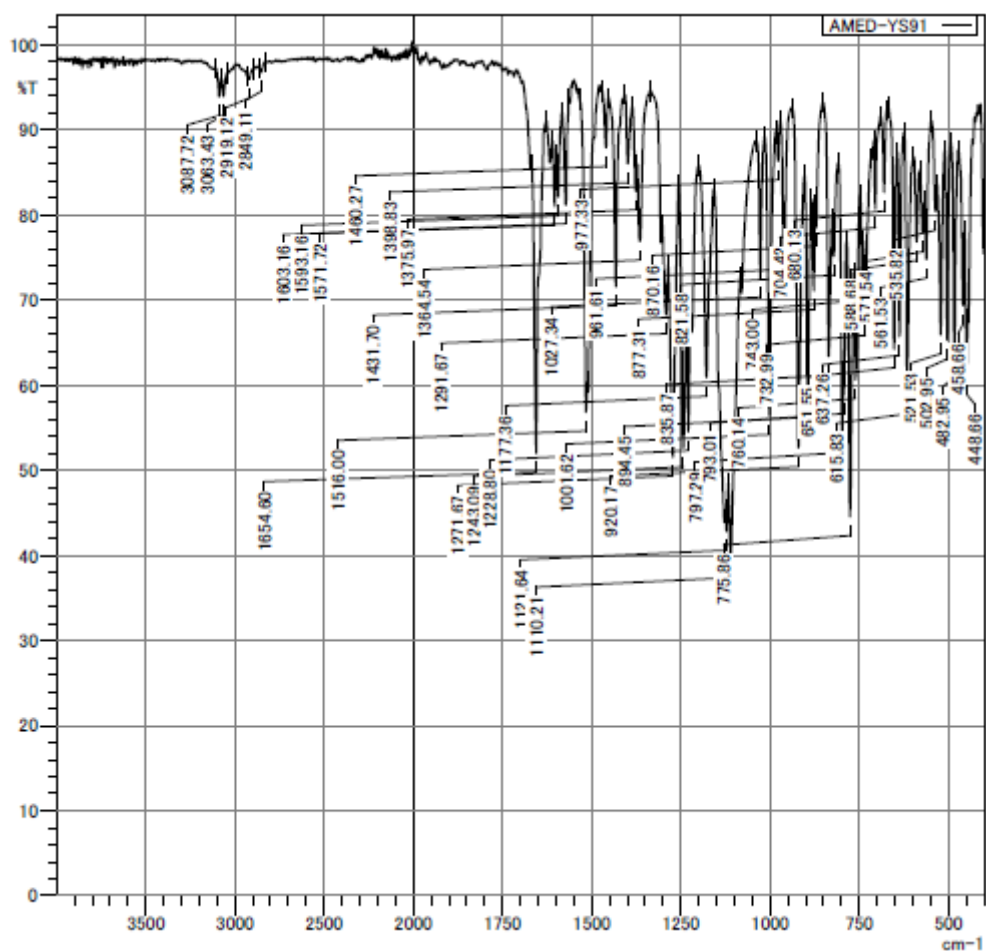

**Figure S20.** UV-VIS spectrum of compound **6** (MeCN/H<sub>2</sub>O, 1:1)

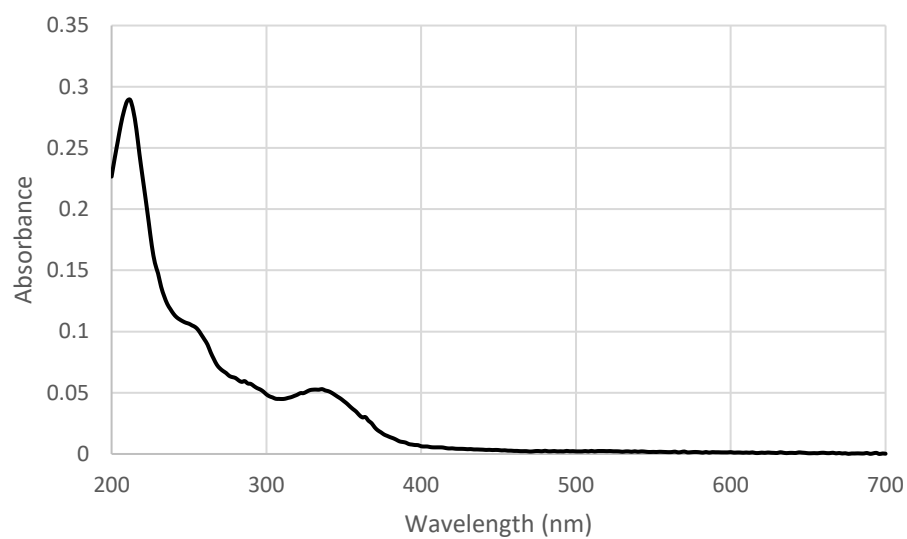

**Figure S21.**  $^1\text{H}$  NMR spectrum of compound **7** (600 MHz, in  $\text{CDCl}_3$ )

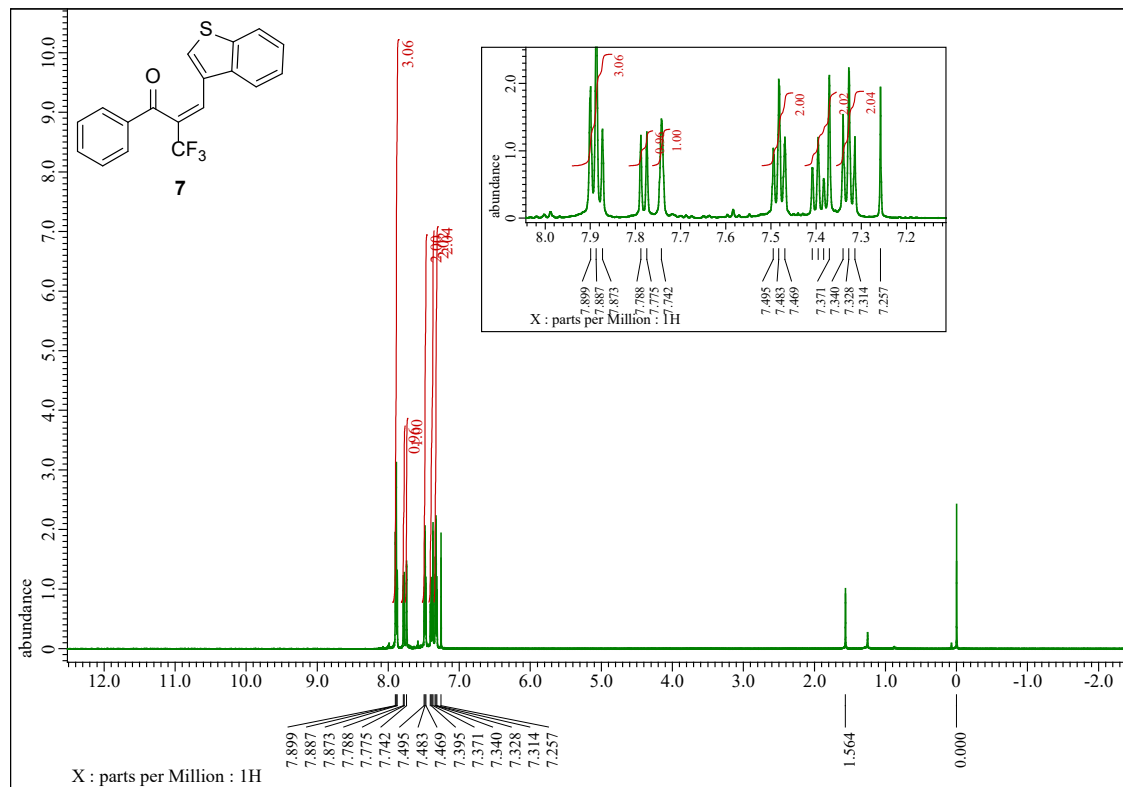

**Figure S22.**  $^{13}\text{C}$  NMR spectrum of compound **7** (150 MHz, in  $\text{CDCl}_3$ )

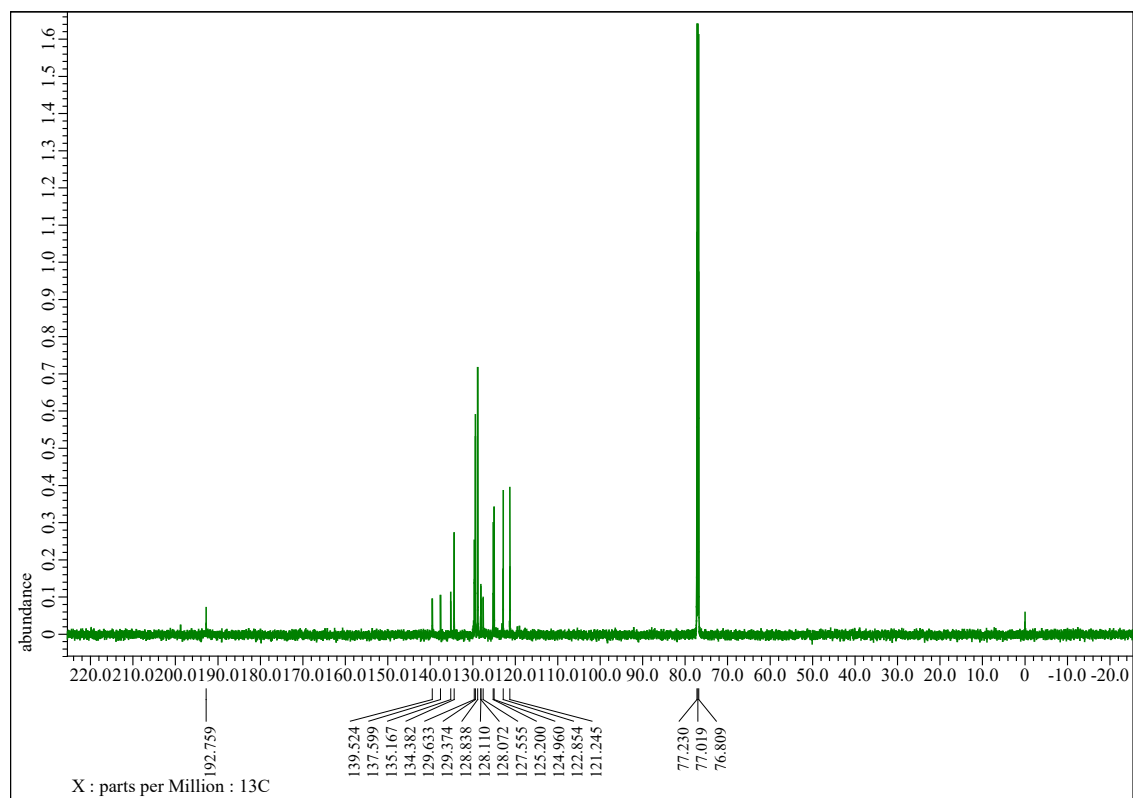

**Figure S23.** FT-IR spectrum of compound **7** (neat)

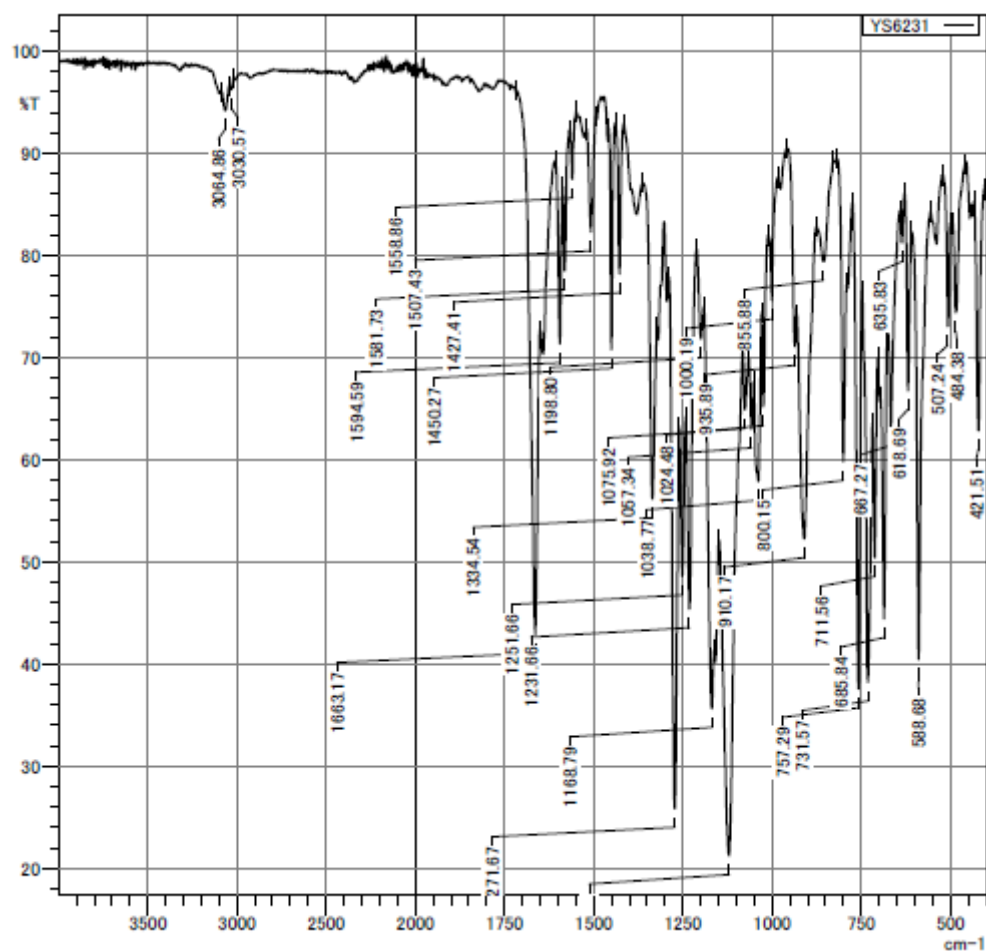

**Figure S24.** UV-VIS spectrum of compound **7** (MeCN/H<sub>2</sub>O, 1:1)

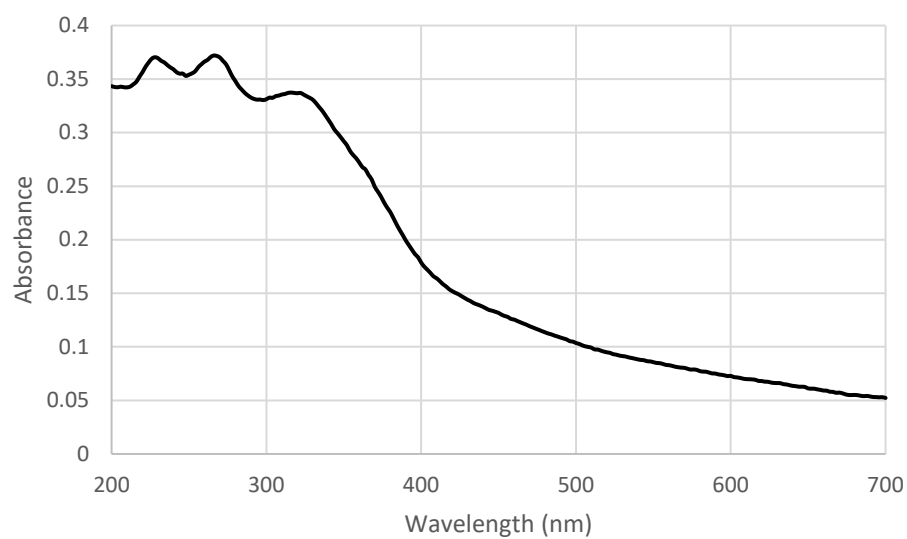

**Figure S25.**  $^1\text{H}$  NMR spectrum of compound **8** (400 MHz, in  $\text{CDCl}_3$ )

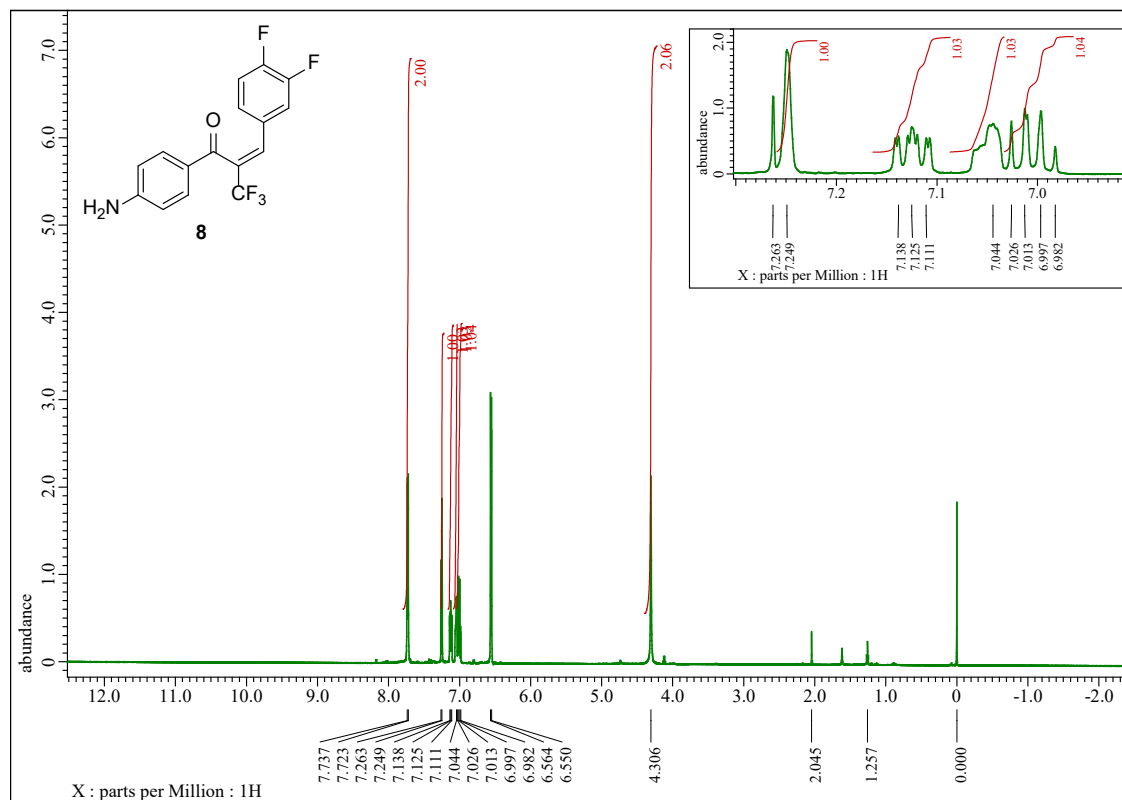

**Figure S26.**  $^{13}\text{C}$  NMR spectrum of compound **8** (150 MHz, in  $\text{CDCl}_3$ )

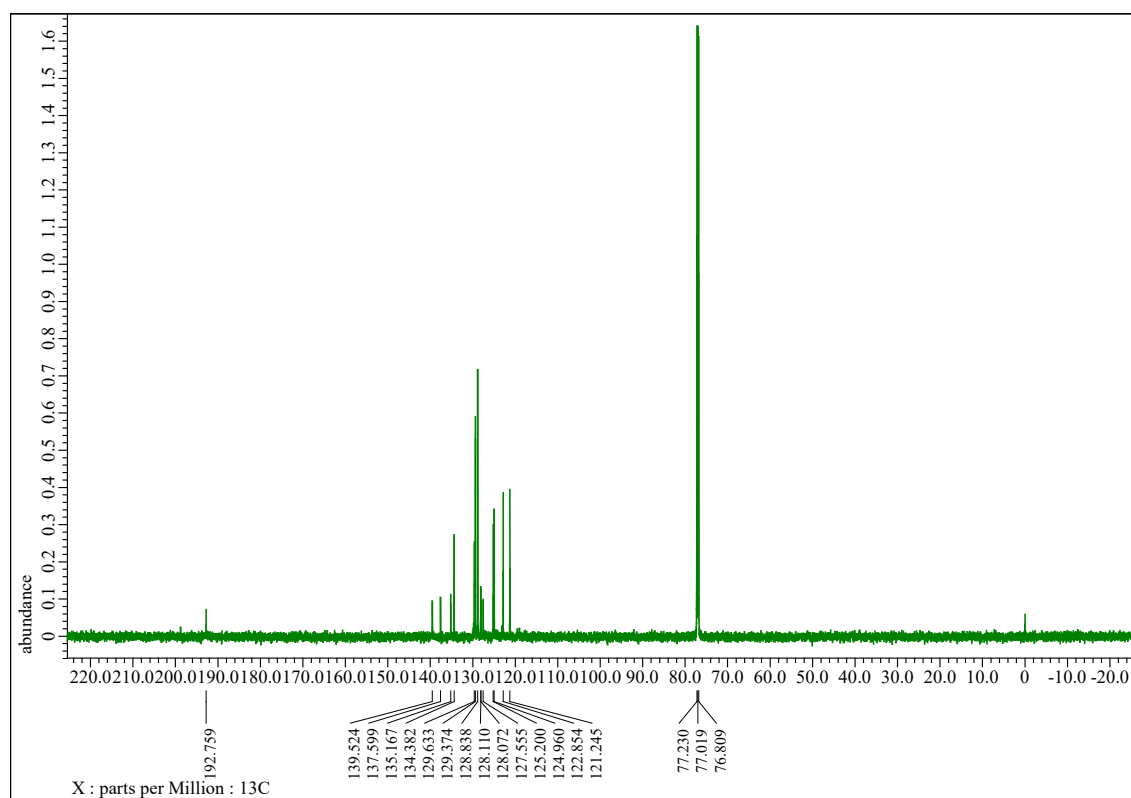

**Figure S27.** FT-IR spectrum of compound **8** (neat)

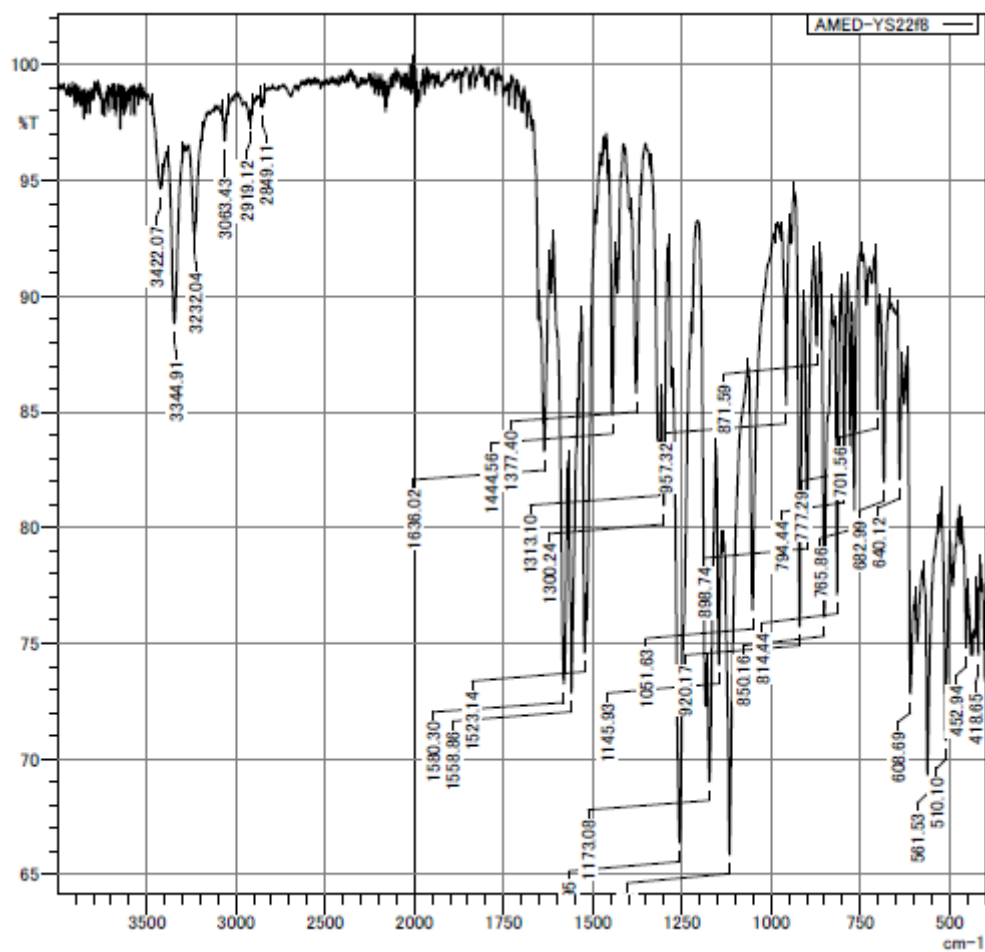

**Figure S28.** UV-VIS spectrum of compound **8** (MeCN/H<sub>2</sub>O, 1:1)

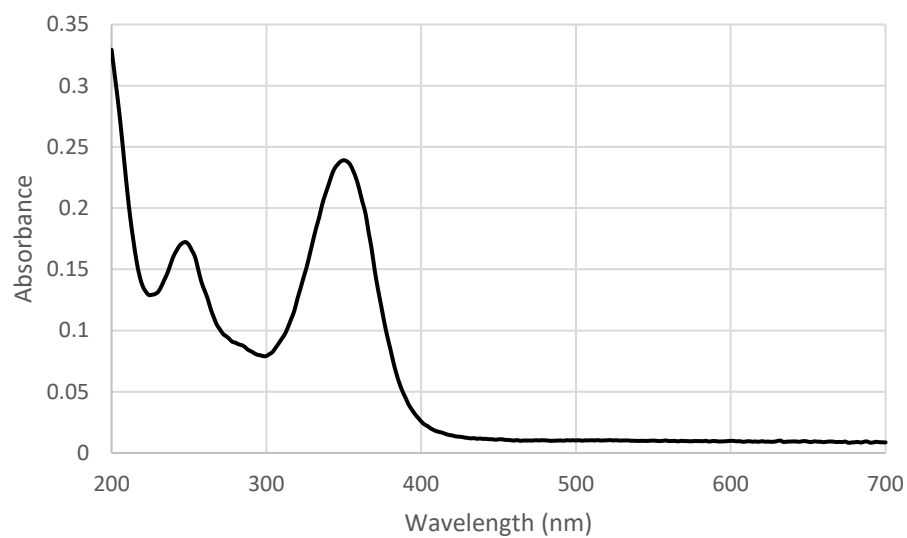

**Figure S29.**  $^1\text{H}$  NMR spectrum of compound **9** (600 MHz, in  $\text{CDCl}_3$ )

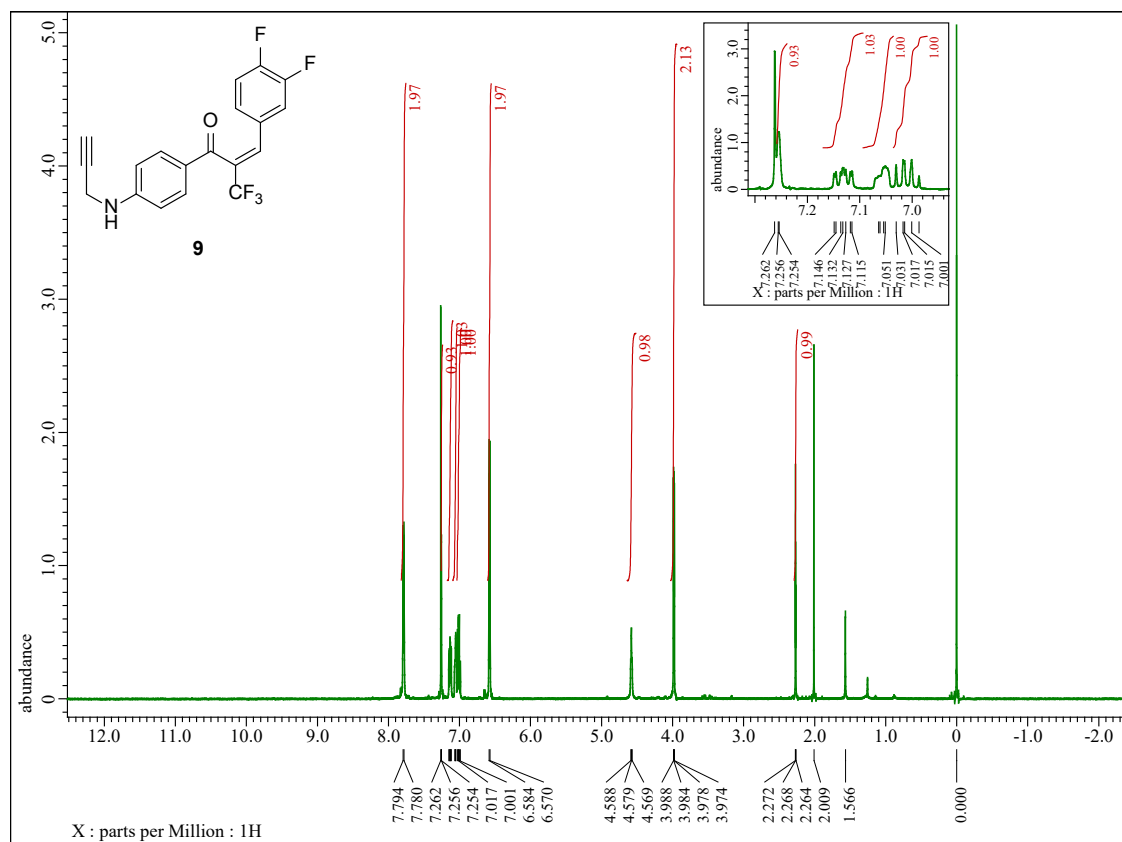

**Figure S30.**  $^{13}\text{C}$  NMR spectrum of compound **9** (150 MHz, in  $\text{CDCl}_3$ )

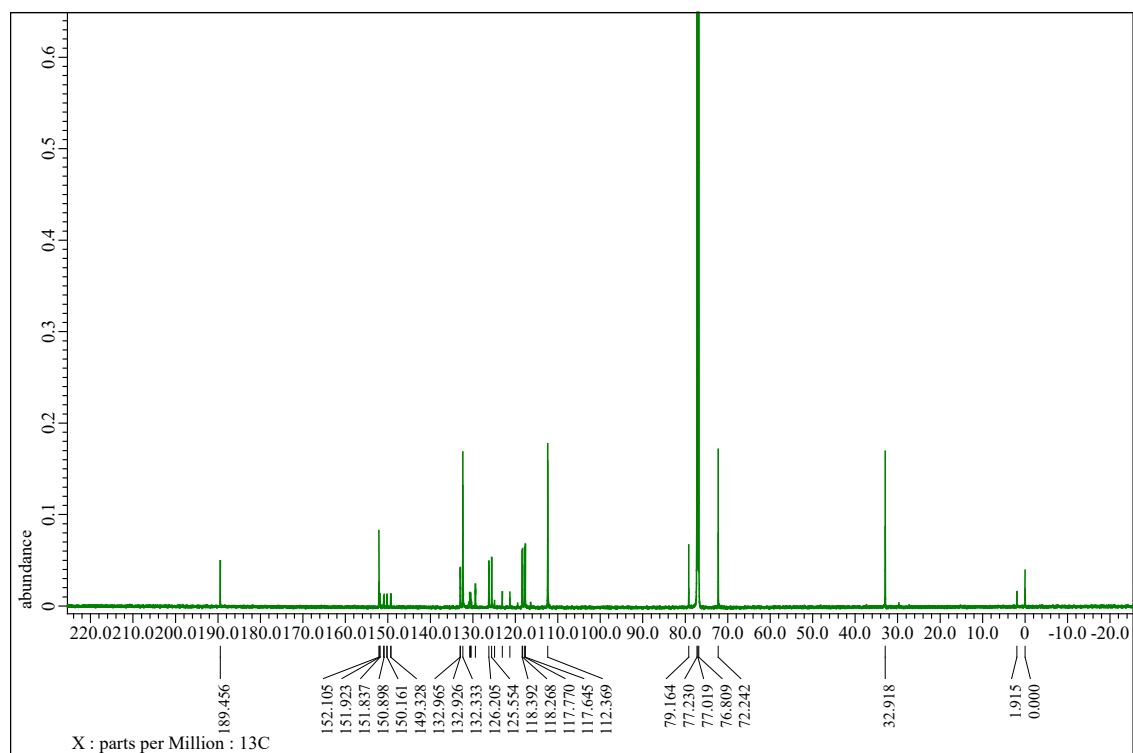

**Figure S31.** FT-IR spectrum of compound **9** (neat)

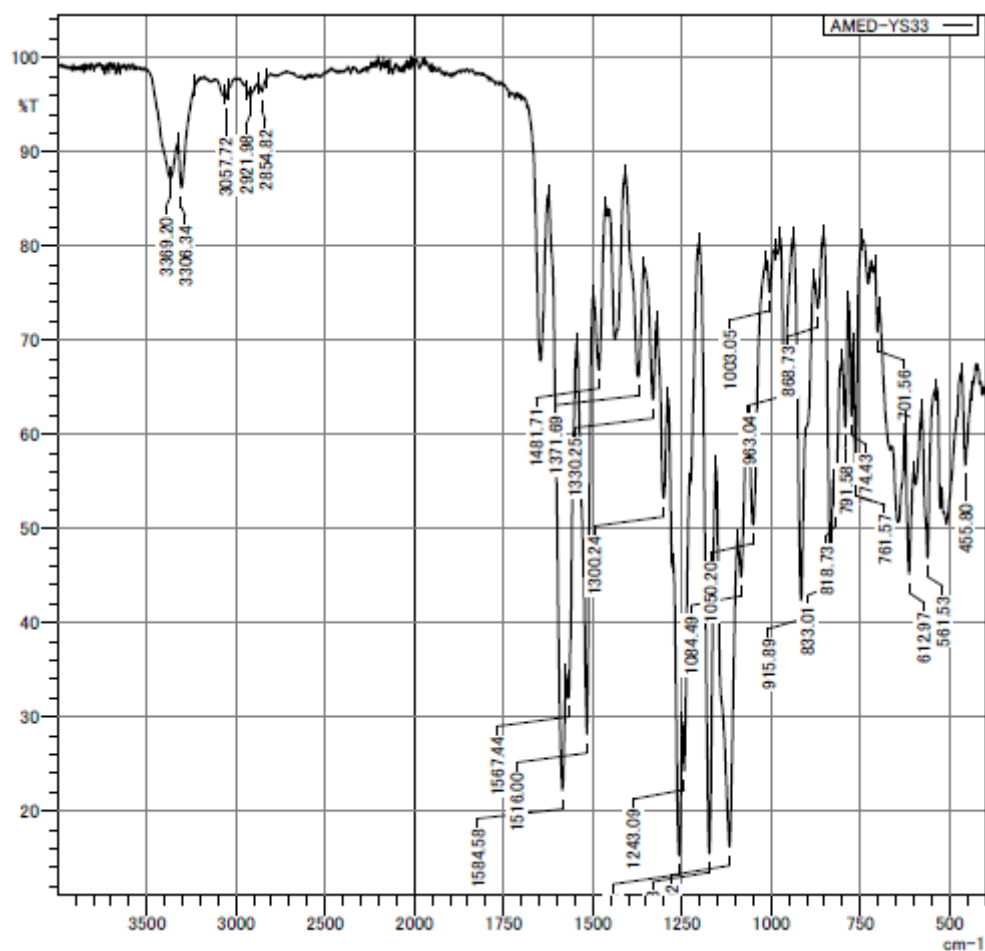

**Figure S32.** UV-VIS spectrum of compound **9** (MeCN/H<sub>2</sub>O, 1:1)

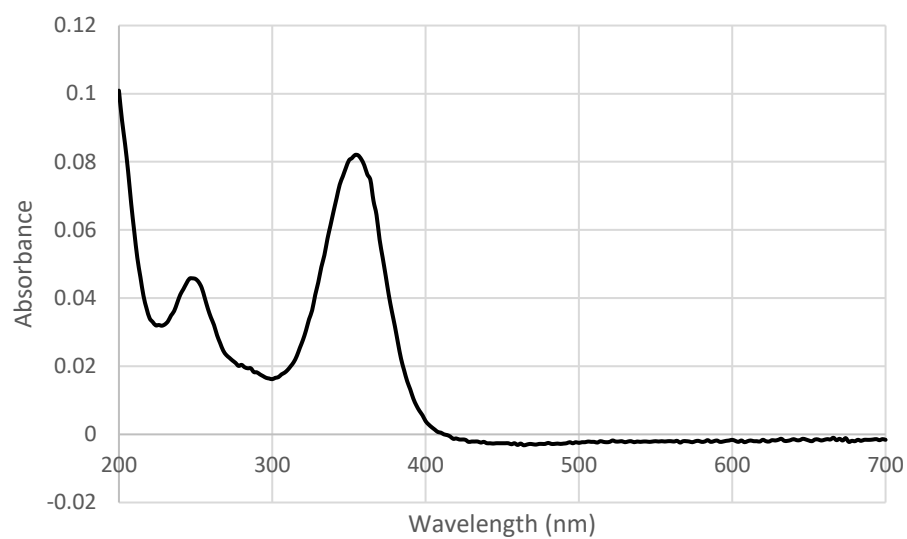

**Figure S33.**  $^1\text{H}$  NMR spectrum of compound **10** (600 MHz, in  $\text{CDCl}_3$ )

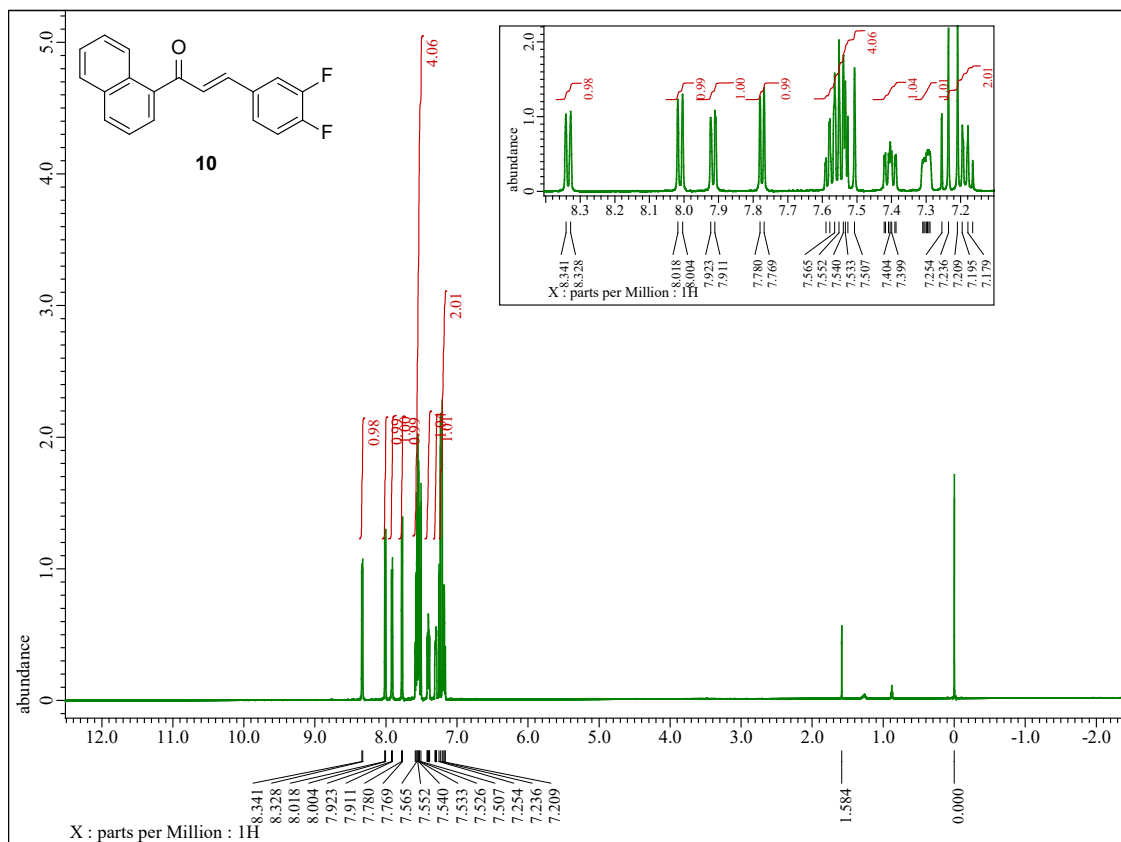

**Figure S34.**  $^{13}\text{C}$  NMR spectrum of compound **10** (150 MHz, in  $\text{CDCl}_3$ )

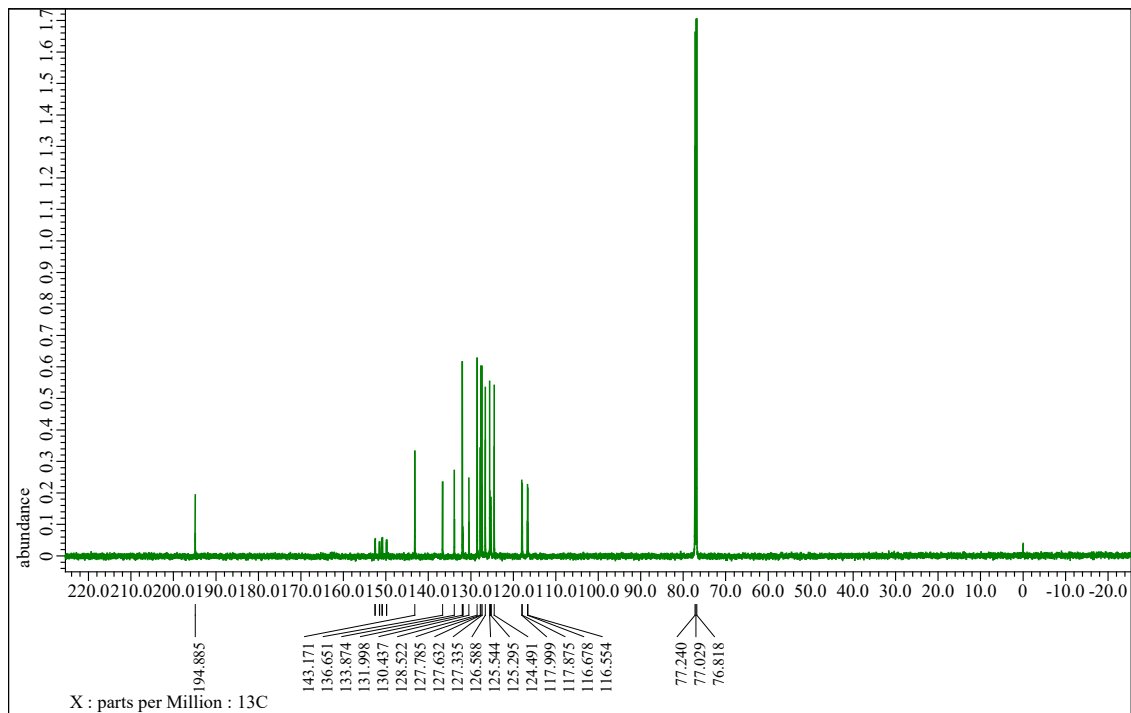

**Figure S35.** FT-IR spectrum of compound **10** (neat)

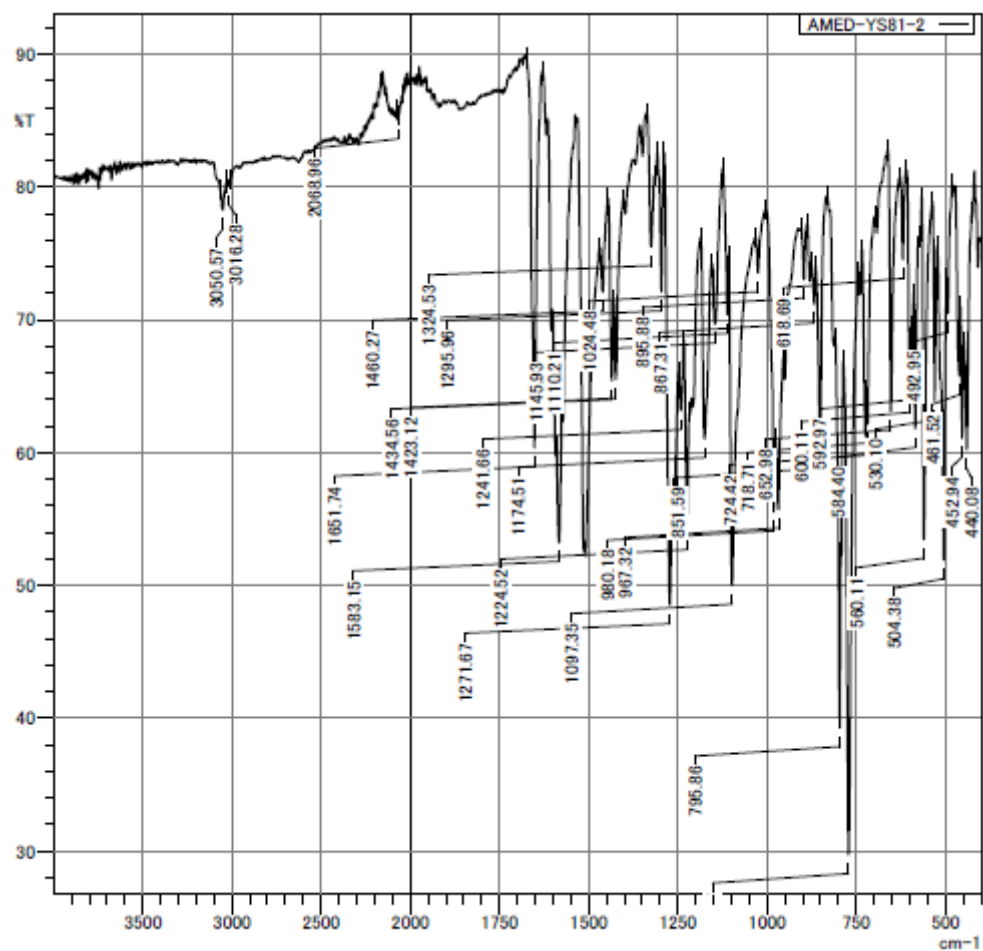

**Figure S36.** UV-VIS spectrum of compound **10** (MeCN/H<sub>2</sub>O, 1:1)

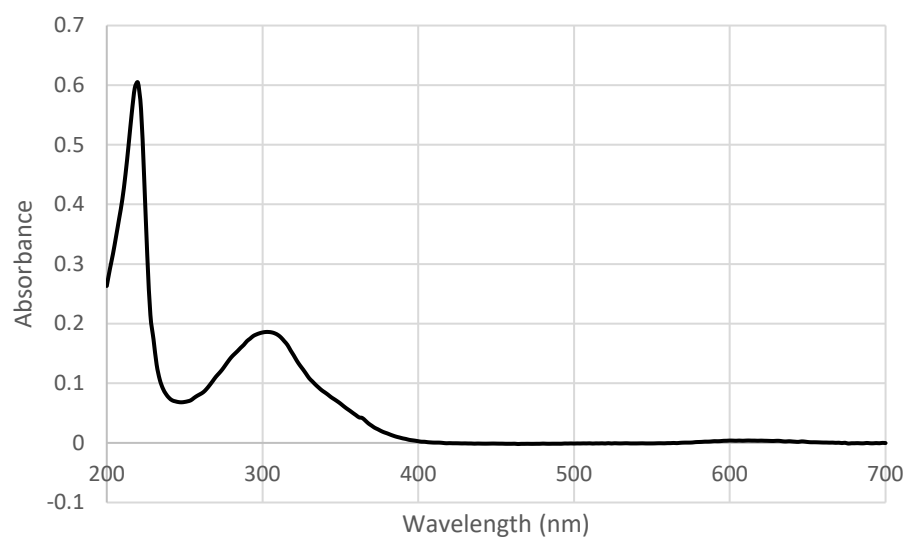

**Figure S37.**  $^1\text{H}$  NMR spectrum of compound **11** (600 MHz, in  $\text{CDCl}_3$ )

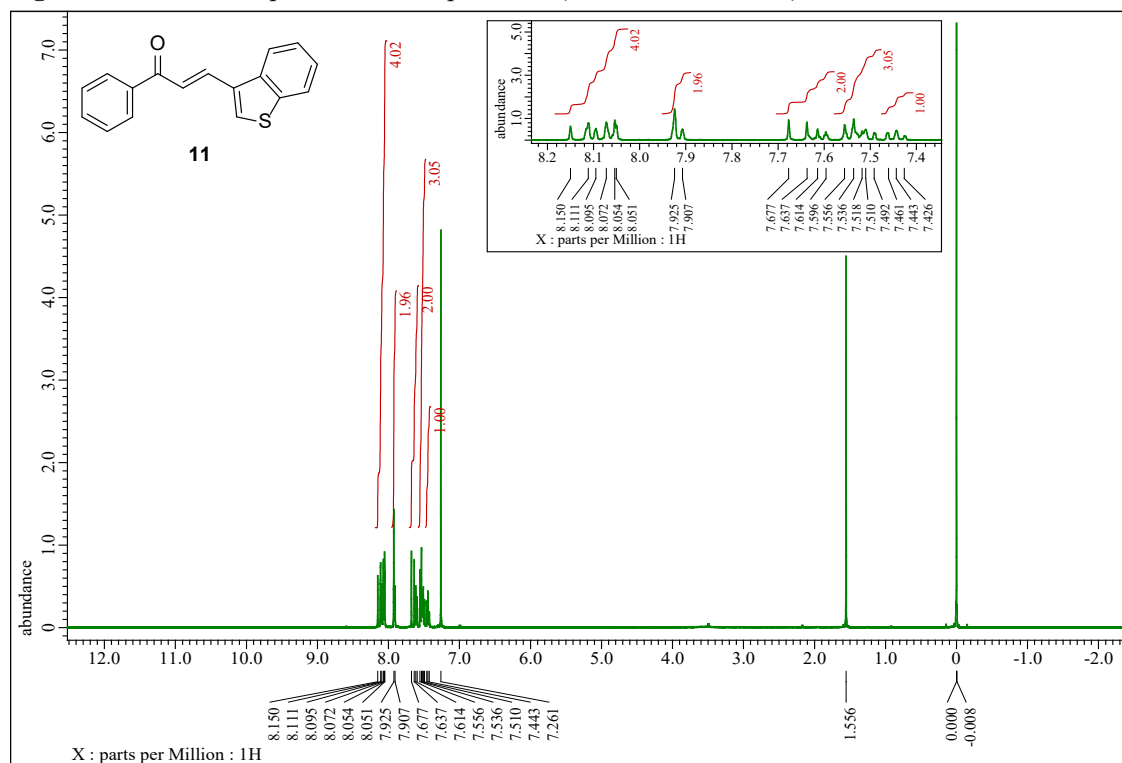

**Figure S38.**  $^{13}\text{C}$  NMR spectrum of compound **11** (150 MHz, in  $\text{CDCl}_3$ )

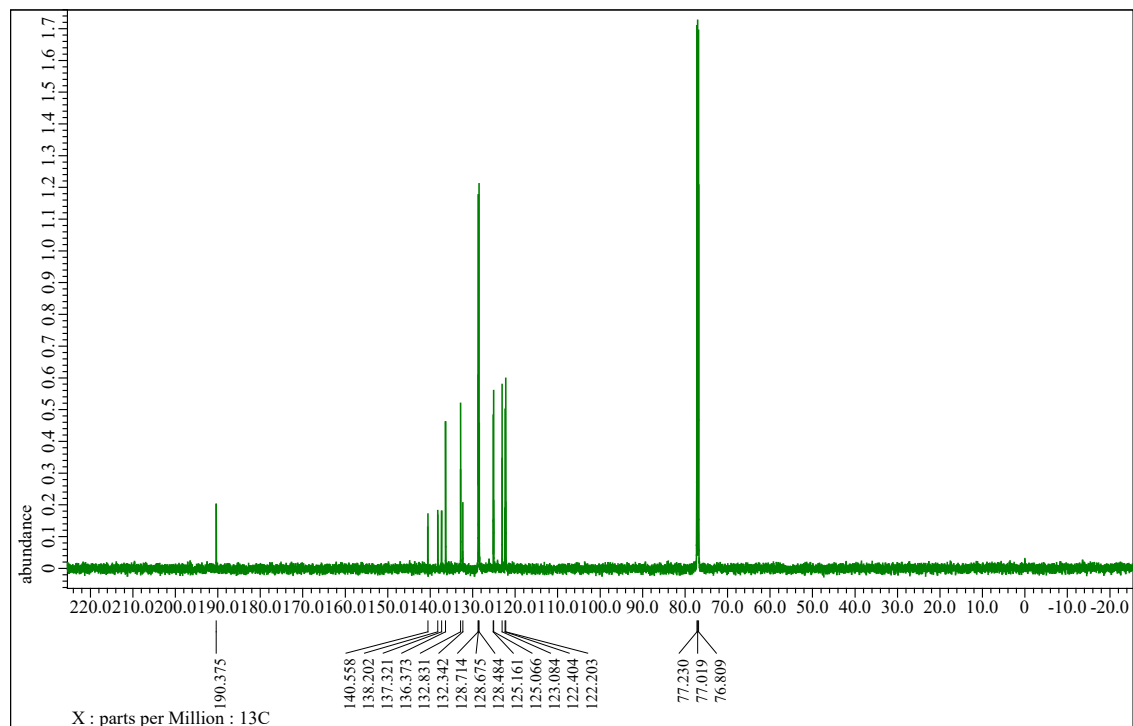

**Figure S39.** FT-IR spectrum of compound **11** (neat)

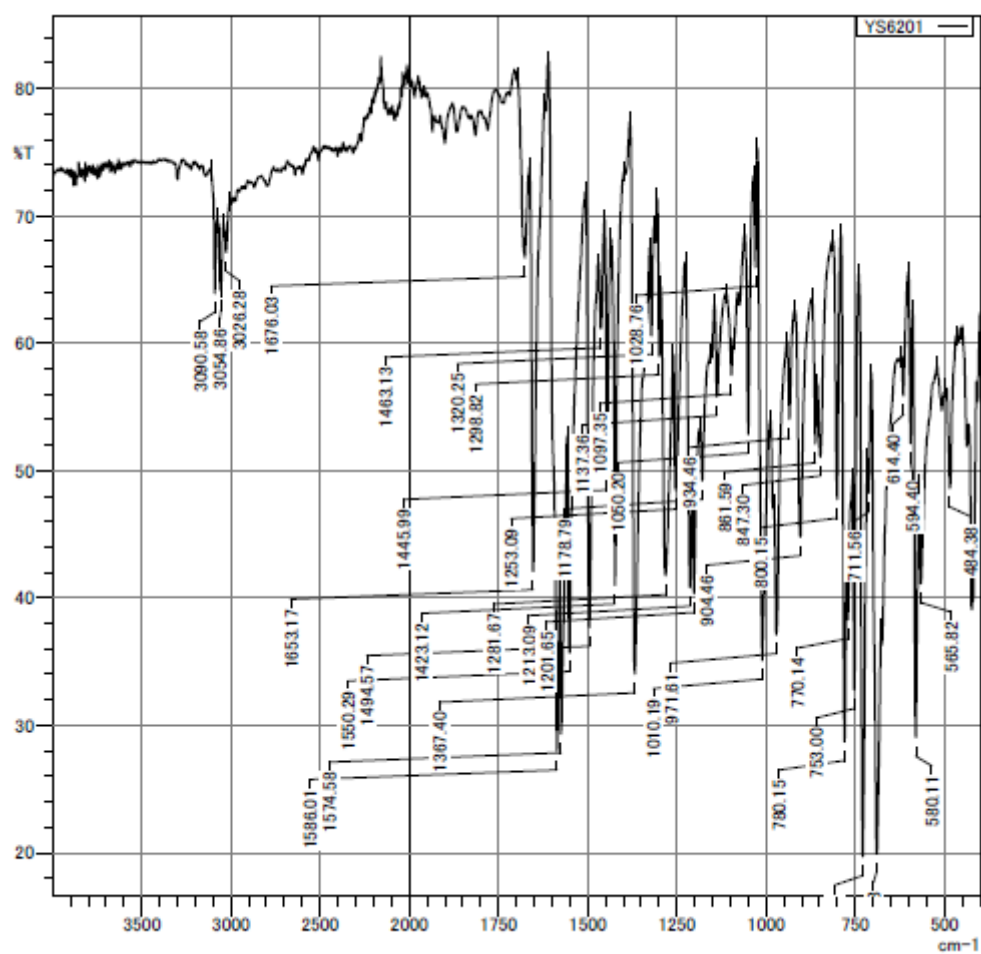

**Figure S40.** UV-VIS spectrum of compound **11** (MeCN/H<sub>2</sub>O, 1:1)

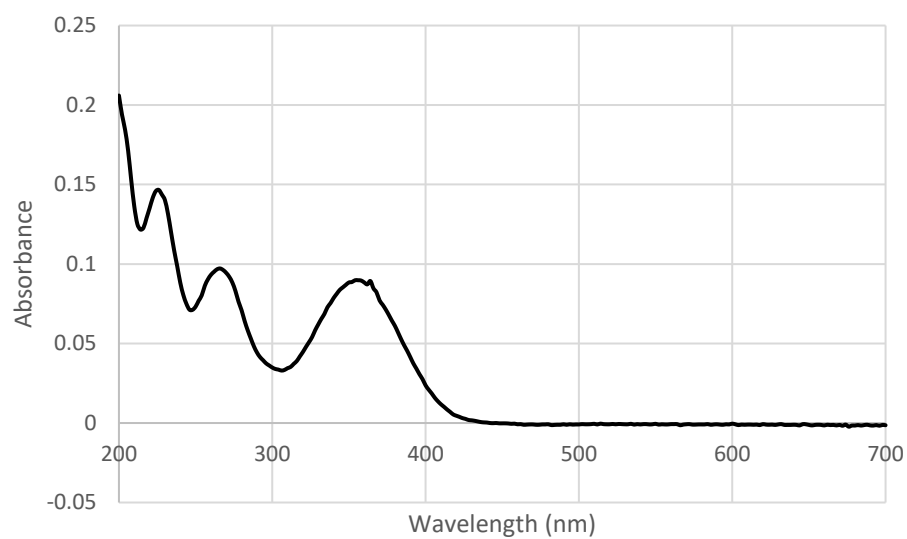

**Table S1.** Detailed information of detected binding proteins.

| Band No. | Accession  | Description                                    | Coverage<br>[%] | # Peptides | # PSMs | # Unique<br>Peptides | MW<br>{kDa} |
|----------|------------|------------------------------------------------|-----------------|------------|--------|----------------------|-------------|
| 1        | P08238     | Heat shock protein<br>HSP 90-beta              | 64              | 53         | 508    | 32                   | 83.2        |
|          | P07900     | Heat shock protein<br>HSP 90-alpha             | 61              | 51         | 476    | 32                   | 84.6        |
|          | Q16891     | MICOS complex<br>subunit MIC60                 | 42              | 42         | 85     | 39                   | 83.6        |
| 2        | P11142     | Heat shock cognate<br>71 kDa protein           | 52              | 35         | 201    | 28                   | 70.9        |
|          | P38646     | Stress-70 protein,<br>mitochondrial            | 46              | 38         | 91     | 37                   | 73.6        |
|          | A0A0G2JIW1 | Heat shock 70 kDa<br>protein 1B                | 37              | 28         | 107    | 16                   | 70.1        |
| 3        | P10809     | 60 kDa heat shock<br>protein,<br>mitochondrial | 59              | 38         | 178    | 38                   | 61          |
|          | P14618     | Pyruvate kinase<br>PKM                         | 60              | 27         | 81     | 14                   | 57.9        |
|          | P48643     | T-complex protein 1<br>subunit epsilon         | 44              | 28         | 62     | 27                   | 59.6        |
|          | P17987     | T-complex protein 1<br>subunit alpha           | 50              | 25         | 63     | 25                   | 60.3        |
|          | P50990     | T-complex protein 1<br>subunit theta           | 41              | 23         | 43     | 23                   | 59.6        |
| 4        | P06733     | Alpha-enolase                                  | 58              | 37         | 161    | 36                   | 47.1        |
| 5        | P60709     | Actin, cytoplasmic 1                           | 52              | 18         | 483    | 5                    | 41.7        |
|          | P68032     | Actin, alpha cardiac<br>muscle 1               | 52              | 14         | 263    | 4                    | 42          |
|          | Q9UQ80     | Proliferation-<br>associated protein<br>2G4    | 39              | 18         | 58     | 18                   | 43.8        |
